# Supplementary material for: Molecular structure and function of myelin protein P0 in membrane stacking
Source: PubMed Central journal article supplement (PMC6345808; doi:10.1038/s41598-018-37009-4), 2019-01-24
Supplement: 41598_2018_37009_MOESM1_ESM.pdf [file 41598_2018_37009_MOESM1_ESM.pdf]

## Supplementary information

### **Molecular structure and function of myelin protein P0 in membrane stacking**

Arne Raasakka<sup>1,2</sup>, Salla Ruskamo<sup>2</sup>, Julia Kowal<sup>3,4</sup>, Huijong Han<sup>2</sup>, Anne Baumann<sup>1,5</sup>, Matti Myllykoski<sup>2</sup>, Anna Fasano<sup>6</sup>, Rocco Rossano<sup>7</sup>, Paolo Riccio<sup>7</sup>, Jochen Bürck<sup>8</sup>, Anne S. Ulrich<sup>8,9</sup>  
Henning Stahlberg<sup>3</sup> & Petri Kursula<sup>1,2,†</sup>

<sup>1</sup>Department of Biomedicine, University of Bergen, Bergen, Norway

<sup>2</sup>Faculty of Biochemistry and Molecular Medicine & Biocenter Oulu, University of Oulu, Oulu, Finland

<sup>3</sup>Center for Cellular Imaging and NanoAnalytics (C-CINA), Biozentrum, University of Basel, Basel, Switzerland

<sup>4</sup>Institute of Molecular Biology and Biophysics, Department of Biology, ETH Zurich, Switzerland

<sup>5</sup>Division of Psychiatry, Haukeland University Hospital, Bergen, Norway

<sup>6</sup>Department of Biosciences, Biotechnologies and Biopharmaceutics, University of Bari, Bari, Italy

<sup>7</sup>Department of Sciences, University of Basilicata, Potenza, Italy

<sup>8</sup>Institute of Biological Interfaces (IBG-2), Karlsruhe Institute of Technology, Karlsruhe, Germany

<sup>9</sup>Institute of Organic Chemistry, Karlsruhe Institute of Technology, Karlsruhe, Germany

†Corresponding author. E-mail: petri.kursula@uib.no

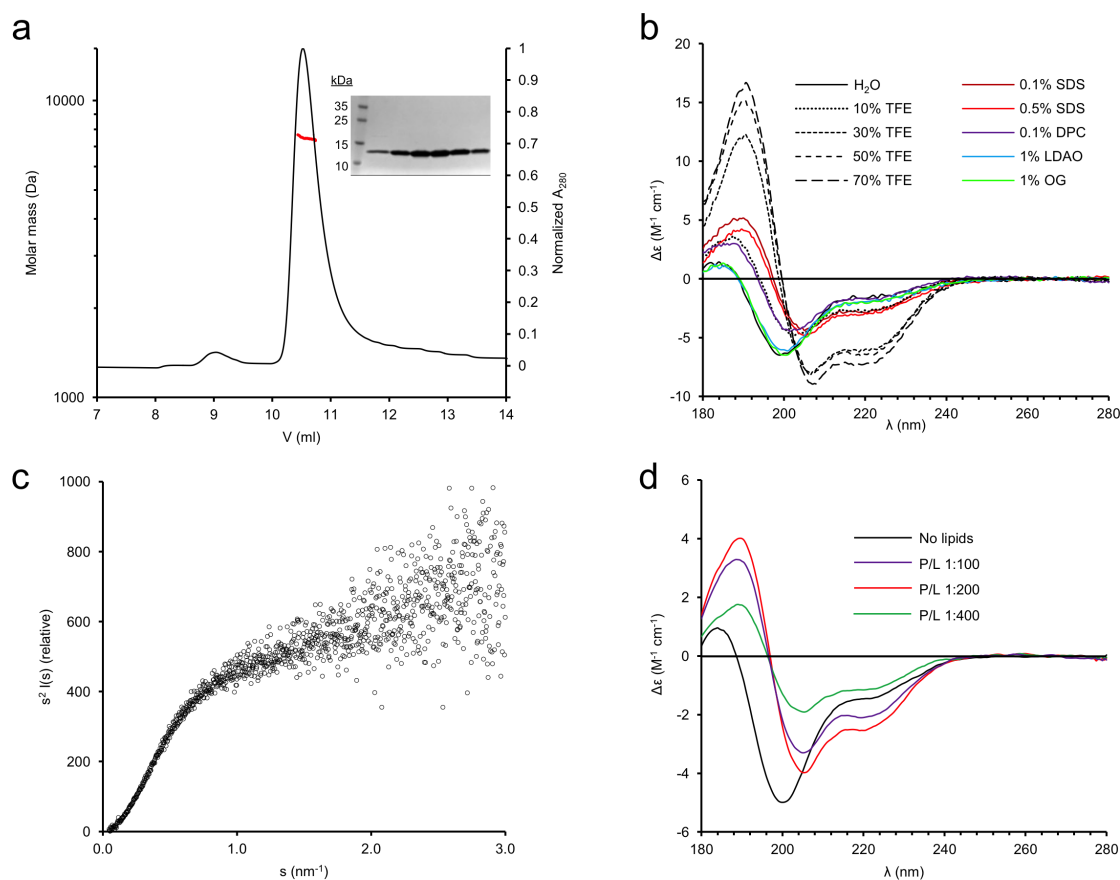

**Supplementary Fig. S1. The purity, monodispersity, and folding of P0ct.** (a) SEC-MALS profile of P0ct displays a mostly monodisperse preparation, with a single major peak corresponding to P0ct when eluting from a Superdex 75 10/300GL column. The calculated mass (7.5 kDa) matches that of a P0ct monomer. SDS-PAGE analysis of the purity of P0ct fractionated with a Superdex 75 16/60 HiLoad SEC column is shown as inset. (b) P0ct gains significant secondary structure content in TFE, DPC and SDS, but not in LDAO or OG, as shown using CD spectroscopy. (c) The Kratky plot displays the highly elongated nature of P0ct. (d) The SRCD spectra of P0ct in DMPC:DMPG (1:1) display different degrees of folding at different P/L ratios, 1:200 producing the strongest signal.

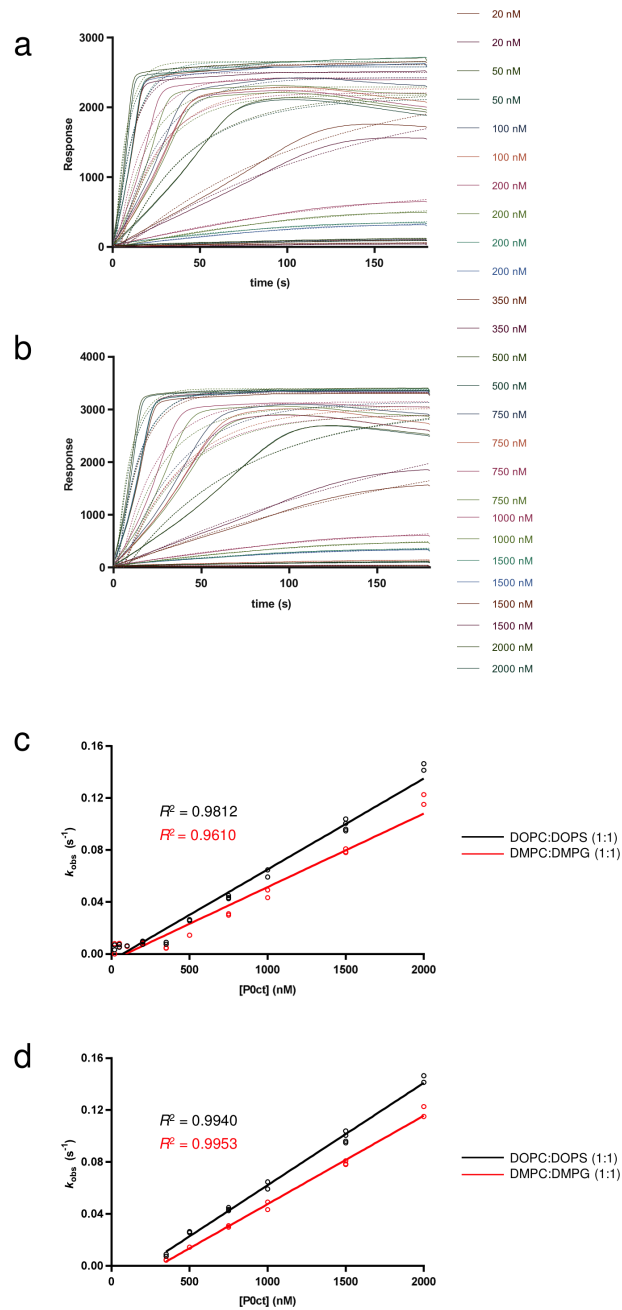

**Supplementary Fig. S2. Kinetic analysis of SPR association data.** The data (solid lines) of irreversible P0ct association with DOPC:DOPS (1:1) and DMPC:DMPG (1:1) (shown as panels a and b, respectively) vesicles fitted individually to an exponential one-phase binding model (dashed lines). (c) The derived  $k_{obs}$  values plotted against P0ct concentration, with the DOPC:DOPS (1:1) and DMPC:DMPG (1:1) data fitted to linear functions (see Supplementary Table 2 for the extracted  $k_{on}$  and  $k_{off}$  values). (d) Same data but all data points below the critical binding concentration have been omitted, resulting in a better linear fit.

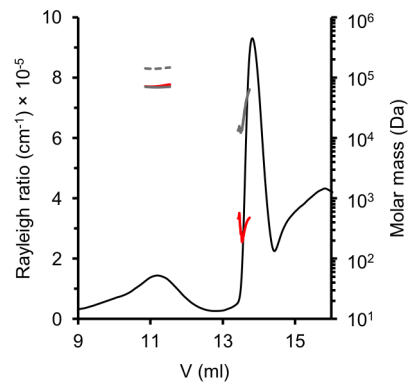

**Supplementary Fig. S3. SEC-MALS of P0 in LDAO.** Analysis of full-length P0 monodispersity and oligomeric state using SEC-MALS in LDAO. The Rayleigh ratio is shown (black) together with the total mass (gray dash), protein mass (red) and detergent mass for each peak (gray solid).

**Supplementary Table S1. SAXS parameters.**

| <b>Data collection parameters</b>                     |                     |
|-------------------------------------------------------|---------------------|
| Instrument                                            | P12, PETRAIII, DESY |
| Wavelength (nm)                                       | 0.124               |
| Angular range (nm <sup>-1</sup> )                     | 0.027 - 4.801       |
| Exposure time (s)                                     | 0.045               |
| Concentration range (mg ml <sup>-1</sup> )            | 1.1 - 4.2           |
| Temperature (°C)                                      | 20                  |
| <b>Structural parameters</b>                          |                     |
| $I_0$ (relative) [from p(r)]                          | 1882                |
| $R_g$ (nm) [from p(r)]                                | 2.67                |
| $I_0$ (relative) [from Guinier]                       | 1892                |
| $R_g$ (nm) [from Guinier]                             | 2.46                |
| $R_g$ (nm) [from EOM ensemble]                        | 2.69                |
| $D_{max}$ (nm) [from GNOM]                            | 11.06               |
| $D_{max}$ (nm) [from EOM ensemble]                    | 8.03                |
| <b>Molecular mass determination</b>                   |                     |
| Molecular mass $M_r$ (kDa) [from $I_0$ using p(r)]    | 8.4                 |
| Molecular mass $M_r$ (kDa) [from $I_0$ using Guinier] | 8.4                 |
| Theoretical $M_r$ from sequence (kDa)                 | 7.99                |
| <b>Software</b>                                       |                     |
| Primary data reduction                                | PRIMUS              |
| Data processing                                       | PRIMUS              |
| <i>Ab initio</i> analysis                             | GASBOR              |
| Conformational ensemble analysis                      | EOM                 |
| Validation and averaging                              | PRIMUS              |
| Three-dimensional graphics representation             | PyMOL               |
| <b>EOM model parameters</b>                           |                     |
| <i>Conformer #1</i>                                   |                     |
| $R_g$ (nm)                                            | 2.488               |
| $D_{max}$ (nm)                                        | 7.904               |
| Mass fraction                                         | 0.182               |
| <i>Conformer #2</i>                                   |                     |
| $R_g$ (nm)                                            | 2.867               |
| $D_{max}$ (nm)                                        | 8.264               |
| Mass fraction                                         | 0.182               |
| <i>Conformer #3</i>                                   |                     |
| $R_g$ (nm)                                            | 3.946               |
| $D_{max}$ (nm)                                        | 12.73               |
| Mass fraction                                         | 0.182               |
| <i>Conformer #4</i>                                   |                     |
| $R_g$ (nm)                                            | 2.068               |
| $D_{max}$ (nm)                                        | 6.14                |
| Mass fraction                                         | 0.364               |
| <i>Conformer #5</i>                                   |                     |
| $R_g$ (nm)                                            | 2.954               |
| $D_{max}$ (nm)                                        | 9.862               |
| Mass fraction                                         | 0.090               |
| Total mass fraction of main conformers                | 1.000               |

**Supplementary Table S2.** Kinetic parameters derived from P0ct association phase with vesicles.

| Vesicle composition | Fitting set 1 <sup>a</sup>                                            |                                                         |        | Fitting set 2 <sup>a</sup>                                            |                                                         |        |
|---------------------|-----------------------------------------------------------------------|---------------------------------------------------------|--------|-----------------------------------------------------------------------|---------------------------------------------------------|--------|
|                     | $k_{\text{on}} (\text{nM}^{-1} \text{s}^{-1})^{\text{b}} \times 10^5$ | $k_{\text{off}} (\text{s}^{-1})^{\text{c}} \times 10^2$ | $R^2$  | $k_{\text{on}} (\text{nM}^{-1} \text{s}^{-1})^{\text{b}} \times 10^5$ | $k_{\text{off}} (\text{s}^{-1})^{\text{c}} \times 10^2$ | $R^2$  |
| DOPC:DOPS (1:1)     | $6.994 \pm 0.1978$                                                    | $-0.4874 \pm 0.1827$                                    | 0.9812 | $7.873 \pm 0.1629$                                                    | $-1.655 \pm 0.1629$                                     | 0.9940 |
| DMPC:DMPG (1:1)     | $5.657 \pm 0.2326$                                                    | $-0.5059 \pm 0.2148$                                    | 0.9610 | $6.804 \pm 0.1252$                                                    | $-2.042 \pm 0.1468$                                     | 0.9953 |

<sup>a</sup> Fitting set 1 contains all data points from the linear fit, whereas all data points below 350 nM were omitted from Fitting set 2.

<sup>b</sup> Slope of the linear fit function to  $k_{\text{obs(on)}}$  vs. [P0ct].

<sup>c</sup> Y-axis intercept of the linear fit function to  $k_{\text{obs(on)}}$  vs. [P0ct]
